# Supplementary material for: Epidermal growth factor prevents APOE4 and amyloid-beta-induced cognitive and cerebrovascular deficits in female mice
Source: Springer Nature journal article supplement (doi:10.1186/s40478-016-0387-3), 2016-10-27

## a Claudin 5 representative image

### DL-Cx

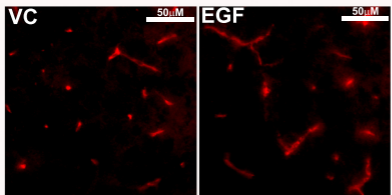

## b Laminin Density

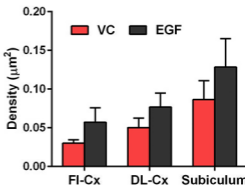

### Subiculum

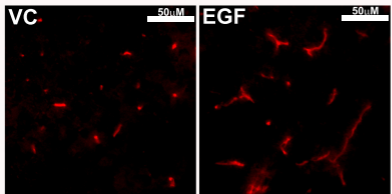

## c CD31 Density

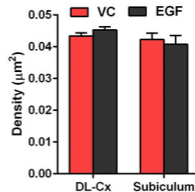

## d EGFR representative blot

### Cortex

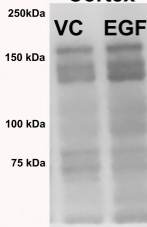

### Hippocampus

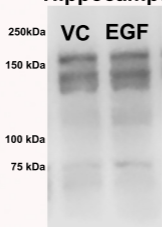

Supplement: MOESM1 [file 25666084]
